# Supplementary material
Source: PubMed Central journal article supplement (PMC6814293)
Supplement: NIHMS1052334-supplement-1.pdf [file NIHMS1052334-supplement-1.pdf]

| Supplementary Table. Patient characteristics                                                                                                                                                                                                                                                                                                                                               |                            |                         |        |                         |        |                         |        |          |
|--------------------------------------------------------------------------------------------------------------------------------------------------------------------------------------------------------------------------------------------------------------------------------------------------------------------------------------------------------------------------------------------|----------------------------|-------------------------|--------|-------------------------|--------|-------------------------|--------|----------|
|                                                                                                                                                                                                                                                                                                                                                                                            |                            | Overall (N=472)         |        | 3-5 cycles (N=157)      |        | 6-9 cycles (N=315)      |        |          |
|                                                                                                                                                                                                                                                                                                                                                                                            |                            | N                       | %      | N                       | %      | N                       | %      | P-value* |
| <b>Age, years</b>                                                                                                                                                                                                                                                                                                                                                                          | Median (IQ range)          | 67 (58-72)              |        | 67 (58-72)              |        | 67 (58-72)              |        | 0.9254   |
| <b>Gender</b>                                                                                                                                                                                                                                                                                                                                                                              | Male                       | 381                     | (81.2) | 126                     | (81.3) | 255                     | (81.2) | 0.9833   |
|                                                                                                                                                                                                                                                                                                                                                                                            | Female                     | 88                      | (18.8) | 29                      | (18.7) | 59                      | (18.8) |          |
|                                                                                                                                                                                                                                                                                                                                                                                            | NA                         | 3                       | -      | 2                       | -      | 1                       | -      |          |
| <b>ECOG-PS</b>                                                                                                                                                                                                                                                                                                                                                                             | 0                          | 191                     | (47.8) | 57                      | (47.9) | 134                     | (47.7) | 0.6485   |
|                                                                                                                                                                                                                                                                                                                                                                                            | 1                          | 173                     | (43.3) | 49                      | (41.2) | 124                     | (44.1) |          |
|                                                                                                                                                                                                                                                                                                                                                                                            | ≥2                         | 36                      | (9.0)  | 13                      | (10.9) | 23                      | (8.2)  |          |
|                                                                                                                                                                                                                                                                                                                                                                                            | NA                         | 72                      | -      | 38                      | -      | 34                      | -      |          |
| <b>WBC count</b>                                                                                                                                                                                                                                                                                                                                                                           | Median (IQ range)          | 7.7 (6.2-9.8)           |        | 7.3 (6.0-9.3)           |        | 7.9 (6.4-10.0)          |        | 0.0701   |
| <b>Visceral metastasis (Liver, Lung, Bone)</b>                                                                                                                                                                                                                                                                                                                                             | Yes                        | 207                     | (43.9) | 57                      | (36.3) | 150                     | (47.6) | 0.0196   |
|                                                                                                                                                                                                                                                                                                                                                                                            | No                         | 265                     | (56.1) | 100                     | (63.7) | 165                     | (52.4) |          |
| <b>BMI</b>                                                                                                                                                                                                                                                                                                                                                                                 | Median (IQ range)          | 27.0 (24.2-29.4)        |        | 26.1 (23.9-29.1)        |        | 27.1 (24.4-29.9)        |        | 0.0810   |
| <b>Ethnicity</b>                                                                                                                                                                                                                                                                                                                                                                           | Not Hispanic/Latino, White | 393                     | (83.3) | 124                     | (79.0) | 269                     | (85.4) | 0.2133   |
|                                                                                                                                                                                                                                                                                                                                                                                            | Not Hispanic/Latino, Black | 11                      | (2.3)  | 6                       | (3.8)  | 5                       | (1.6)  |          |
|                                                                                                                                                                                                                                                                                                                                                                                            | Hispanic/Latino            | 36                      | (7.6)  | 12                      | (7.6)  | 24                      | (7.6)  |          |
|                                                                                                                                                                                                                                                                                                                                                                                            | Other                      | 6                       | (1.3)  | 3                       | (1.9)  | 3                       | (1.0)  |          |
|                                                                                                                                                                                                                                                                                                                                                                                            | Unknown                    | 26                      | (5.5)  | 12                      | (7.6)  | 14                      | (4.4)  |          |
| <b>Prior perioperative chemotherapy</b>                                                                                                                                                                                                                                                                                                                                                    | Yes                        | 58                      | (12.3) | 27                      | (17.2) | 31                      | (9.8)  | 0.0218   |
|                                                                                                                                                                                                                                                                                                                                                                                            | No                         | 414                     | (87.7) | 130                     | (82.8) | 284                     | (90.2) |          |
| <b>Platinum agent</b>                                                                                                                                                                                                                                                                                                                                                                      | Cisplatin                  | 338                     | (71.6) | 113                     | (72.0) | 225                     | (71.4) | 0.9014   |
|                                                                                                                                                                                                                                                                                                                                                                                            | Carboplatin                | 134                     | (28.4) | 44                      | (28.0) | 90                      | (28.6) |          |
| <b>Overall Survival</b>                                                                                                                                                                                                                                                                                                                                                                    | Median (IQ range)          | 21.8 months (13.2-52.7) |        | 21.2 months (13.2-59.8) |        | 22.2 months (13.2-48.2) |        | 0.6535   |
|                                                                                                                                                                                                                                                                                                                                                                                            | 1-year (95% CI)            | 78.7% (75.0%-82.6%)     |        | 77.9% (71.5%-84.9%)     |        | 79.1% (74.6%-83.8%)     |        |          |
|                                                                                                                                                                                                                                                                                                                                                                                            | 2-year (95% CI)            | 46.7% (42.1%-51.9%)     |        | 46.1% (37.9%-55.9%)     |        | 47.0% (41.5%-53.6%)     |        |          |
| <b>Abbreviations:</b> BMI: body mass index; CI: confidence interval; ECOG-PS: Eastern Cooperative Oncology Group-Performance Status; IQ: interquartile; NA: not available; OS: overall survival; WBC: white blood cells. *Wilcoxon's rank sum test was employed for comparing age, WBC, BMI; logrank test for OS; and Pearson's Chi-square test for the remaining (categorical) variables. |                            |                         |        |                         |        |                         |        |          |
